# Supplementary material for: Combined Treatment with Prednisone and Bromocriptine&nbsp;does not Influence the Pregnancy Outcome in Fresh Embryo Transfer Cycles
Source: Research Square preprint supplement (doi:10.21203/rs.3.rs-100359/v1), 2020-11-04
Supplement: Supplementary file 1 [file f1d8df7f32179ce1e38acdfd.docx]

**Supplement Table 1. Gn dosage and hormone levels in the two groups**

|  | **Combined** | **Single** | ***P*** |
| --- | --- | --- | --- |
| Endometrium thickness（mm） | 11.64±2.18 | 11.38±2.28 | 0.001 |
| Gn Duration (day) | 10.85±4.33 | 10.22±1.88 | 0.000 |
| Total Gn dose (IU) | 2137.49±1871.22 | 2190.868±99.76 | 0.244 |
| E2 level on HCG day (pg/ml) | 7259.54±2024.41 | 7366.07±1930.75 | 0.087 |
| P level on trigger day (ng/ml) | 1.574±0.762 | 1.317±0.781 | 0.000 |
| LH level on trigger day (mIU/ml) | 1.78±1.07 | 1.55±0.84 | 0.000 |
| FSH level on trigger day (mIU/ml) | 15.21±7.72 | 16.59±8.38 | 0.000 |
| Estimated No. of oocytes retrieval | 15.94±4.49 | 16.16±4.48 | 0.117 |
| No. of oocytes retrieval | 15.78±5.61 | 16.10±5.22 | 0.056 |

Note: Values are presented as mean±SD. *P*<0.05 was considered to be significant.

**Supplement Table 2. different protocols proportions in the fresh transfer cycles**

| **Group** | **Protocols** | | **χ2** | ***p*** |
| --- | --- | --- | --- | --- |
| **agonist** | **antagonist** |
| Combined | 826 | 20 | 1.690 | 0.194 |
| Single | 727 | 26 |  |  |

*P*<0.05 was considered to be significant.
